# Supplementary material for: KRAS-mutant colon cancer cells respond to combined treatment of ABT263 and axitinib
Source: PubMed Central journal article supplement (PMC6400663; doi:10.1042/bsr20181786), 2019-03-06
Supplement: bsr-39-bsr20181786_Supp1.pdf [file bsr-39-bsr20181786_Supp1.pdf]

### Supporting Figure Legends

**Figure S1.** The IC<sub>50</sub> was detected in HCT116 and HCT15 cells. The concentrations were required to inhibit 50% of cell growth. The results showed that the concentration of ABT-263 and AXIT was almost 2 $\mu$ M and 1 $\mu$ M.

| <b>Drug \ Cell</b> | <b>IC<sub>50</sub>(<math>\mu</math>M)</b> | <b>HCT15</b>                        | <b>HCT116</b>                         |
|--------------------|-------------------------------------------|-------------------------------------|---------------------------------------|
| <b>ABT263</b>      |                                           | <b>2.017 <math>\pm</math> 0.097</b> | <b>2.024 <math>\pm</math> 0.328</b>   |
| <b>AXIT</b>        |                                           | <b>0.876 <math>\pm</math> 0.129</b> | <b>1.027 <math>\pm</math> 0.0.434</b> |
